# Supplementary material for: Normal hydrocarbons tumble rapidly in a deep, water-soluble cavitand
Source: Royal Society of Chemistry journal article supplement (doi:10.1039/b515733a), 2005-12-14
Supplement: b515733a.pdf [file b515733a.pdf]

# Normal Hydrocarbons Tumble Rapidly in a Deep, Water-Soluble Cavitand

Richard J. Hooley, Shannon M. Biros and Julius Rebek, Jr.\*

*The Skaggs Institute for Chemical Biology and the Department of Chemistry, The Scripps Research Institute MB-26, 10550 North Torrey Pines Rd., La Jolla, CA 92037.*

[jrebek@scripps.edu](mailto:jrebek@scripps.edu)

## Supplementary Information

### 1. General Information

NMR spectra were recorded on a Bruker DRX-600 spectrometer. Proton ( $^1\text{H}$ ) chemical shifts are reported in parts per million ( $\delta$ ) with respect to tetramethylsilane (TMS,  $\delta=0$ ), and referenced internally with respect to the protio solvent impurity. Deuterated NMR solvents were obtained from Cambridge Isotope Laboratories, Inc., Andover, MA, and used without further purification. *N*-alkanes (pentane-dodecane, >99%) were obtained from Aldrich Chemical Company, St. Louis, MO and were used as received. Molecular modeling (molecular mechanics calculations) was carried out using the AMBER force field with the solvation (dielectric) setting for water as implemented by MacroModel of Maestro (Schrodinger, Inc.) on a Silicon Graphics Octane workstation. Cavitand **2** was synthesized according to the procedure described in: Biros, S.M., Ullrich, E.C., Hof, F., Trembleau, L., Rebek, J., *J. Am. Chem. Soc.*, 2004, **126**, 2870.

### 2. Supplementary Figures.

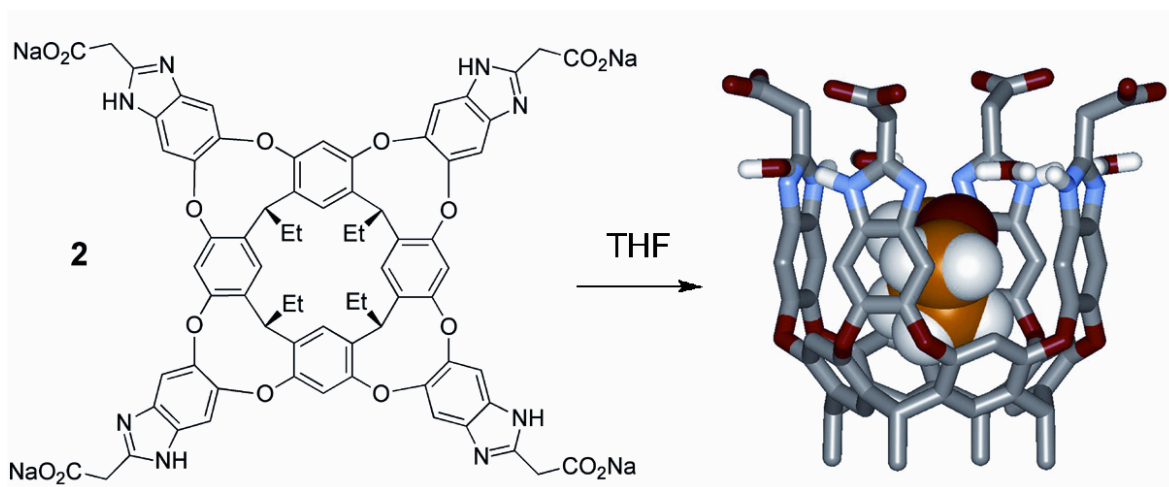

**Supplementary Figure 1.** Structure of water-soluble cavitand (host) **2**.

### 3. Supplementary Tables.

**Supplementary Table 1.** Observed and predicted (calculated) chemical shifts for *n*-alkanes complexed with cavitand **2** in D<sub>2</sub>O (2 mM, 600 MHz).

| SDS observed $\delta$ 's | <i>n</i> -alkane  | Predicted $\delta$ 's | Observed $\delta$ 's |
|--------------------------|-------------------|-----------------------|----------------------|
|                          | HEXANE            | Predicted             | Observed             |
| C <sub>1</sub> : -3.95   | C <sub>1/6</sub>  | -2.28                 | -2.17                |
| C <sub>2</sub> : -3.35   | C <sub>2/5</sub>  | -2.33                 | -2.17                |
| C <sub>3</sub> : -2.95   | C <sub>3/4</sub>  | -2.63                 | -2.67                |
| C <sub>4</sub> : -2.30   |                   |                       |                      |
| C <sub>5</sub> : -1.30   | HEPTANE           | Predicted             | Observed             |
| C <sub>6</sub> : -0.20   | C <sub>1/7</sub>  | -1.83                 | -1.80                |
| C <sub>7</sub> : 0.70    | C <sub>2,6</sub>  | -1.78                 | -1.80                |
| C <sub>8</sub> : 1.10    | C <sub>3/5</sub>  | -2.13                 | -2.10                |
| C <sub>9</sub> : 1.20    | C <sub>4</sub>    | -2.40                 | -2.37                |
| C <sub>10</sub> : 1.20   |                   |                       |                      |
| C <sub>11</sub> : 1.20   | OCTANE            | Predicted             | Observed             |
|                          | C <sub>1/8</sub>  | -1.63                 | -1.59                |
|                          | C <sub>2/7</sub>  | -1.33                 | -1.35                |
|                          | C <sub>3/6</sub>  | -1.58                 | -1.59                |
|                          | C <sub>4/5</sub>  | -1.80                 | -1.83                |
|                          |                   |                       |                      |
|                          | NONANE            | Predicted             | Observed             |
|                          | C <sub>1/9</sub>  | -1.58                 | -1.50                |
|                          | C <sub>2/8</sub>  | -1.13                 | -1.11                |
|                          | C <sub>3/7</sub>  | -1.13                 | -1.11                |
|                          | C <sub>4/6</sub>  | -1.25                 | -1.25                |
|                          | C <sub>5</sub>    | -1.40                 | -1.50                |
|                          |                   |                       |                      |
|                          | DECANE            | Predicted             | Observed             |
|                          | C <sub>1/10</sub> | -1.58                 | -1.48                |
|                          | C <sub>2/9</sub>  | -1.08                 | -1.00                |
|                          | C <sub>3/8</sub>  | -0.93                 | -0.91                |
|                          | C <sub>4/7</sub>  | -0.80                 | -0.82                |
|                          | C <sub>5/6</sub>  | -0.75                 | -0.75                |
|                          |                   |                       |                      |
|                          | UNDECANE          | Predicted             | Observed             |
|                          | C <sub>1/11</sub> | -1.58                 | -1.49                |
|                          | C <sub>2/10</sub> | -1.08                 | -0.99                |
|                          | C <sub>3/9</sub>  | -0.88                 | -0.83                |
|                          | C <sub>4/8</sub>  | -0.60                 | -0.60                |

|  |           |       |       |
|--|-----------|-------|-------|
|  | $C_{5/7}$ | -0.30 | -0.33 |
|  | $C_6$     | -0.30 | -0.23 |
